# Supplementary material for: Three-dimensional hierarchical flower-like bimetallic–organic materialsin situgrown on carbon cloth and doped with sulfur as an air cathode in a microbial fuel cell
Source: Royal Society of Chemistry journal article supplement (doi:10.1039/d2nj05476k), 2023-01-01
Supplement: d2nj05476k1.pdf [file d2nj05476k1.pdf]

**In-situ grown on carbon cloth of three-dimensional hierarchical flower-like bimetallic-organic materials doped with sulfur as air cathode in microbial fuel cell**

Jinrong Lu <sup>a</sup>, Linde Ren <sup>a</sup>, Cheng Li <sup>a</sup>, Hua Liu <sup>a\*</sup>

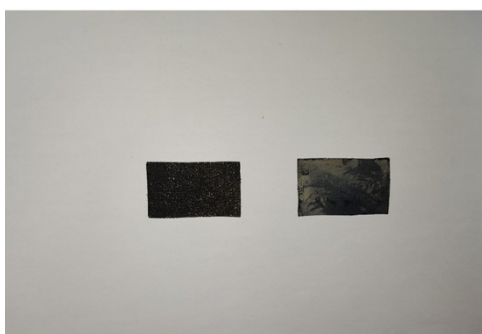

**Fig. S1.** Blank carbon cloth (left) and carbon cloth loaded with Zn/Co-3DHFLM (right).

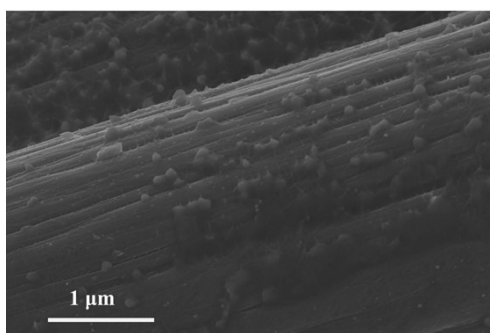

**Fig. S2.** SEM images of Zn/Co-S-3DHFLM loaded on carbon cloth.

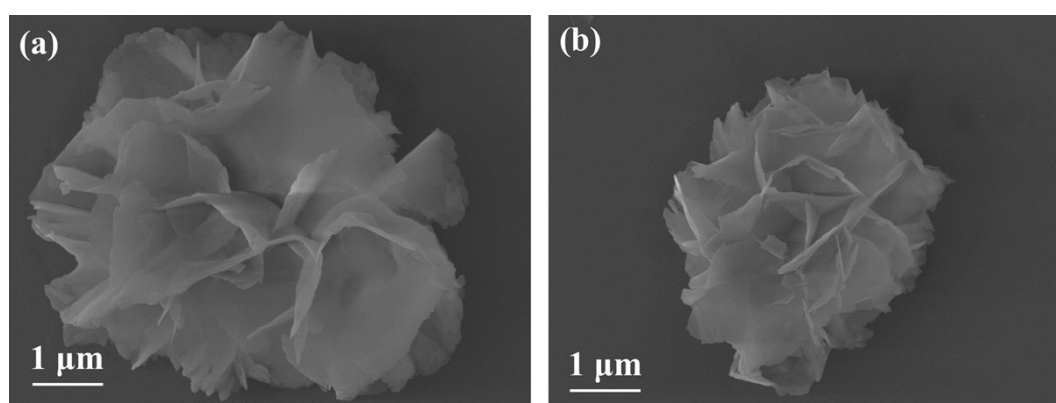

**Fig. S3.** SEM images of (a) Co-3DHFLM, (b) Zn/Co-3DHFLM.

---

<sup>a</sup> Chemical Science and Engineering College, North Minzu University, Yinchuan, 750021, PR China. E-mail address: [3181947@qq.com](mailto:3181947@qq.com) (H. Liu).

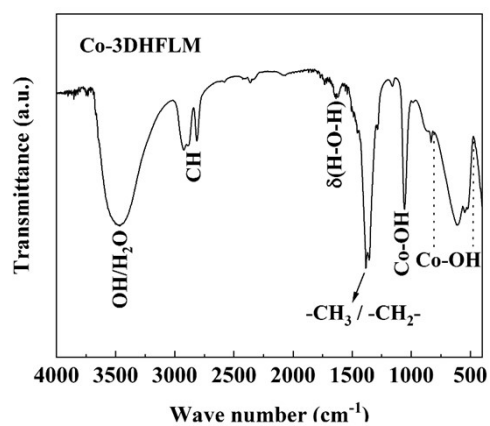

**Fig. S4.** FTIR spectra of the as-prepared Co-3DHFLM.

**Table S1.** Surface elemental compositions (in atom%) of Zn/Co-S-3DHFLM.

| Sample | C    | O    | Zn  | Co   | S    |
|--------|------|------|-----|------|------|
| At %   | 39.9 | 27.1 | 1.4 | 11.6 | 20.0 |

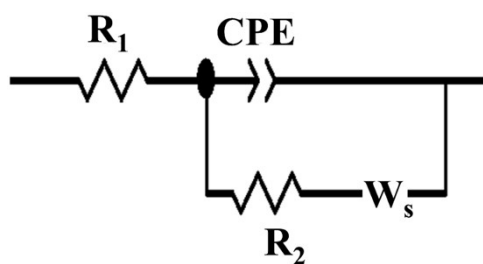

**Fig. S5.** Equivalent circuit.

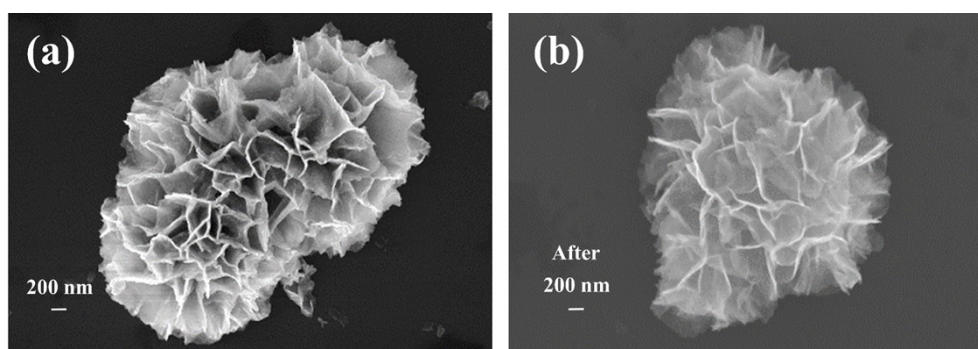

**Fig. S6.** SEM images of Zn/Co-S-3DHFLM (a) before stability experiments and (b) after undergoing 160 000s stability experiments.

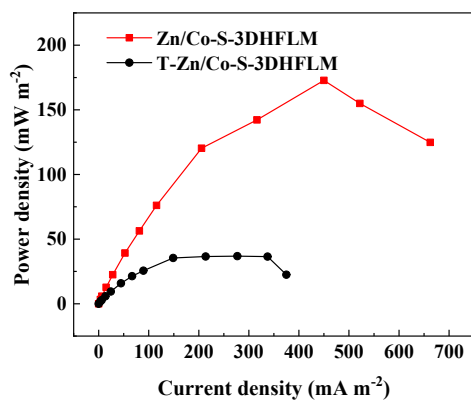

**Fig. S7.** Power density curves.

**Table S2.** The raw materials with corresponding prices, consumption and sources for synthesis of Zn/Co-S-3DHFLM.

|                                                       | Price                    | Consumption | Cost (\$) | Source                   |
|-------------------------------------------------------|--------------------------|-------------|-----------|--------------------------|
| 2-Methylimidazole                                     | 0.083 \$·g <sup>-1</sup> | 0.656 g     | 0.054     |                          |
| Zn (NO <sub>3</sub> ) <sub>2</sub> ·6H <sub>2</sub> O | 3.327 \$·g <sup>-1</sup> | 0.094 g     | 0.313     |                          |
| Co (NO <sub>3</sub> ) <sub>2</sub> ·6H <sub>2</sub> O | 0.113 \$·g <sup>-1</sup> | 1.674 g     | 0.189     | Aladdin, Shanghai, China |
| Methanol                                              | 7.218 \$·L <sup>-1</sup> | 0.325 L     | 2.346     |                          |
| Na <sub>2</sub> S·9H <sub>2</sub> O                   | 0.469 \$·g <sup>-1</sup> | 1.922 g     | 0.901     |                          |
| Zn/Co-S-3DHFLM                                        |                          | 1 g         | 3.803     | As-synthesized           |
